# 1 Autonomous bird sound recording 2 outperforms direct human 3 observation: Synthesis and new 4 evidence

5 Kevin Darras<sup>1</sup>, Péter Batáry<sup>1\*</sup>, Brett Furnas<sup>2\*</sup>, Irfan Fitriawan<sup>3</sup>, Yeni Mulyani<sup>4</sup>, Teja  
6 Tschamtké<sup>1</sup>

7

8 <sup>1</sup> Department of Crop Sciences, Agroecology, Georg-August University,  
9 Grisebachstr. 6, 37077 Göttingen, Germany

10 <sup>2</sup> Wildlife Investigations Laboratory, California Department of Fish and Wildlife,  
11 1701 Nimbus Road, Suite D, California, 95670, USA

12 <sup>3</sup> Conservation Staff PT Henrison Inti Persada, Sorong District, West Papua 98457

13 <sup>4</sup> Department of Forest Resources Conservation and Ecotourism, Faculty of  
14 Forestry, Bogor Agricultural University, Bogor, Indonesia

15 \*these authors contributed equally to this work

16

17 Keywords: ARU, autonomous sound recording unit, point counts, sound recorders,  
18 signal-to-noise ratio, birds, soundscape

19

## 20 **Abstract**

21 1) Autonomous sound recording techniques have gained considerable  
22 traction in the last decade, but the question still remains whether they can  
23 replace human observation surveys to sample some animal taxa.

24 Especially bird survey methods have been tested using classical point  
25 counts and autonomous sound recording techniques.

26 2) We review the latest information by comparing both survey methods'  
27 standardization, verifiability, sampling completeness, data types,  
28 compatibility, and practicality by means of a systematic review and a  
29 meta-analysis of alpha and gamma species richness levels sampled by  
30 both methods across 20 separate studies.

- 31 3) Although sound recording surveys have hitherto not enjoyed the most  
32 effective setups, they yield very similar results in terms of alpha and  
33 gamma species richness. We also reveal the crucial importance of the  
34 microphone (high signal-to-noise ratio) as the sensor that replaces human  
35 senses.  
36 4) We discuss key differences between both methods, while richness  
37 estimates are closely related and 81% of all species were detected by both  
38 methods. Sound recording techniques provide a more powerful and  
39 promising tool to monitor birds in a standardized, verifiable, and  
40 exhaustive way against the golden standard of point counts. Advantages  
41 include the capability of sampling continuously through day or season and  
42 of difficult-to-reach regions in an autonomous way, avoidance of observer  
43 bias and human disturbance effects and higher detection probability of  
44 rare species due to extensive recordings.

45 5)

## 46 **Introduction**

47 In the face of the current threats to global biodiversity, we urgently need to  
48 devise more efficient methods to measure our vanishing, under-sampled  
49 biodiversity (Haughland et al., 2010). We need larger sampling coverage on  
50 temporal and spatial scales to detect trends across regions and with time.  
51 Material and personal resources must be deployed with maximal return on  
52 investment, and to enable international cooperation and re-use of data, we need  
53 to attain a minimal bias with standardized, comparable and repeatable sampling  
54 methods.

55

56 Vertebrates pose a particular challenge for sampling because they are  
57 considerably more mobile than plants or microorganisms, often evading  
58 detection. Most vertebrate taxa are usually surveyed by direct human  
59 observation methods (e.g. point counts and transects) because capture methods  
60 are inherently more intrusive and effort-demanding. Human observers rely on  
61 aural and visual detection to count animals and identify species, but given that  
62 some insects (e.g. cicadas and orthopterans) and most terrestrial vertebrates  
63 commonly use sound (birds, amphibians, mammals, but not reptiles), passive  
64 acoustic monitoring methods have recently gained more attention (Blumstein et  
65 al., 2011).

66

67 For birds in particular, passive acoustic sampling methods have been used  
68 extensively, and many hardware (for an overview see Merchant et al., 2015,  
69 Whytock and Christie, 2016) and software solutions have been developed (Araya-  
70 Salas and Smith-Vidaurre, 2016; Katz et al., 2016; Villanueva-Rivera and  
71 Pijanowski, 2012). However, human observation survey methods are still the  
72 standard, traditional go-to method (Bibby et al., 2000; Ralph et al., 1998).  
73 Although some research has compared acoustic methods with traditional survey  
74 methods, results are controversial as some studies showed that acoustic surveys  
75 are more effective than point counts (e.g. Haselmayer and Quinn, 2000),  
76 whereas other studies concluded the opposite (e.g. Hutto and Stutzman, 2009).  
77 Anuran surveys also follow a similar pattern in that human observation surveys  
78 are most common (Heyer et al 2016), but audio surveys with passive acoustic  
79 monitoring stations are increasingly used (Aide et al., 2013). So far however, no

80 review has summarized these studies, and bird studies provide ample material  
81 for an interesting methodological comparison.

82

83 First we summarize the evidence of existing literature based on a systematic  
84 review including a meta-analysis, and discuss the reasons leading to the  
85 previously mentioned controversial results. Then, we present the inherent  
86 advantages of either method on the example of bird surveys, focusing on a)  
87 standardization and verifiability, b) sampling completeness, c) data type and  
88 compatibility, and d) practicality. We complement the meta-analysis and the  
89 discussion with results from our own field study to analyse the survey methods'  
90 effect on bird detection distances and abundances.

## 91 **Methods**

### 92 **Systematic review and meta-analysis**

#### 93 **Data collection**

94 We searched for scientific publications on ISI Web of Knowledge (R) with the  
95 advanced search function, covering all years and all databases (search date:  
96 12/01/2017). We used the following search string:  
97 *TS=((bird\* OR avian OR avifaun\*) AND ("sound record\*" OR "acoustic record\*"  
98 OR "automated record\*" OR "acoustic monitor\*" OR "recording system\*") AND  
99 ("point count\*" OR "bird count\*" OR "point survey\*" OR "point-count\*" OR "point  
100 transect\*"))*. We also searched Google scholar (search date: 12/01/2017) using  
101 the following search string: *"point count" "sound recording"*, sorted by  
102 relevance, checking all search results.

103 We read all titles - and abstracts when needed - to determine the relevance of  
104 each study for the systematic review. Only peer-reviewed references in English  
105 were considered. In a first step, studies that discussed and compared both  
106 acoustic and observational bird survey methods were included in our systematic  
107 review. Studies focusing on a few selected species were not considered. Full texts  
108 were retrieved and read entirely. The references within the chosen publications  
109 were further checked for additional potential studies.

110 In a second step, studies that additionally published data on bird species  
111 richness recorded with both methods were used in the meta-analysis. The data  
112 were extracted directly from the results in the text, or from the figures using  
113 distance measuring tools in Foxit Reader (version 8.0.2, Foxit software Inc., USA),  
114 or by extracting tables from PDF files using Tabula  
115 (<https://github.com/tabulapdf/tabula>). When data were not available in the

116 publication, we contacted the main author to request them and asked whether  
117 they could also provide unpublished data sets from other studies. Publications  
118 reporting results of several sub-studies, which were either distinct in study  
119 location or methodology, were treated as independent studies. Auxiliary data  
120 such as microphone model, height, signal-to-noise ratio, number of channels,  
121 and time difference between survey methods, were also extracted or requested.  
122 Whenever possible, we computed richness numbers for unlimited and also  
123 identical detection range scenarios, as in some studies, detection ranges are  
124 lower for sound recorders. Bird detection data sets obtained from unlimited  
125 distance point counts and sound recordings yielded so-called unlimited range  
126 richness values. Bird detection data subsets from point counts and sound  
127 recordings, filtered to include only detections below a common detection  
128 distance (the sound recorders' maximal range), yielded identical range richness  
129 values. When no distance data were available to truncate the point count data  
130 sets, we still used the entire data set, yielding conservative richness estimates in  
131 favor of point counts.

### 132 **Data analysis**

133 We used R (version 3.2.3, R core team) for all data analysis and graphing. We  
134 used the metafor R package (Viechtbauer and others, 2010) to calculate log-  
135 transformed ratios of the richness means (alpha and gamma) of both survey  
136 methods (point counts and sound recordings) for both detection range types  
137 (identical and unlimited), hereafter called log response ratios. We used  
138 multivariate meta-analysis models (metafor package, `rma.mv()` function) or  
139 linear mixed-effects models (nlme package, function `lme()`), respectively for  
140 alpha and gamma richness. We assigned the random effect to a study ID number  
141 since some publications include several sub-studies from the same author.  
142 Studies were weighted with the number of sites in alpha richness models, and  
143 with the total survey time effort in gamma richness models. Finally, we checked  
144 the robustness of our results by running subset models excluding studies which  
145 compared richness values between methods that had different detection ranges,  
146 and for which distance data were not available to correct the bias.  
147 For the identical range scenarios, we extracted the model's intercept as the  
148 overall log response ratio, along with its confidence intervals, across all sub-  
149 studies. We compared the overall log response ratio to zero, representing no  
150 richness differences between survey methods. For the unlimited range scenario,  
151 we needed to account for differences in sampling area. We hypothesized that

152 microphone signal-to-noise ratio would ultimately determine the sound detection  
153 space size relative to the unlimited point count detection space. The  
154 microphones' signal-to-noise ratio was included as a moderator in the alpha  
155 richness models (rma.mv() function) and as a fixed effect in the gamma richness  
156 models (lme() function). The significance (at  $P < 0.05$ ) of the signal-to-noise ratio  
157 predictor was assessed.

158 The alpha and gamma richness log response ratios were back-transformed to  
159 response ratios in percent, displayed for each study along with their overall  
160 response ratio.

## 161 **Field studies**

### 162 **Forest surveys**

163 Twenty-eight lowland rainforest plots were visited once by different observers in  
164 the province of Jambi, Indonesia (Fig S1), from April to June 2015, during the  
165 early dry season, which corresponds to the breeding season for birds in Sumatra  
166 (Voous, 1950). Some of the forest plots had previously experienced selective  
167 logging as indicated by tree stumps, and occasional hunting and bird trapping  
168 were reported by inhabitants of the region. During the plot screening, we  
169 recorded a pure tone sequence (0.5, 2, 4, 8, 12 and 16 kHz, one second long at  
170 each step) emitted at distances of 2, 4, 8, 16 and 32 meters from the recorder,  
171 which we call the sound transmission sequence. This sequence was used to  
172 assist in bird call distance estimation.

173

174 Sound recorders (SM2Bat+ recorder fitted with one SMX-II and one SMX-US  
175 microphones) were installed one day before and programmed to start recording  
176 at sunrise. Twenty-minutes point counts were carried out between 6:00 and  
177 10:00, one minute after arriving on the plot, to avoid disturbing secretive birds.  
178 Two survey teams surveyed one plot per day each, and each team comprised  
179 one ornithologist observer and one recordist without ornithological knowledge.  
180 The recordist notified the observer of bird calls that he did not detect and  
181 recorded all calls detected by the observer to aid in identification using a  
182 directional microphone (Sennheiser ME-66 coupled to Olympus LS-3). All  
183 detected birds were identified following MacKinnon and Phillipps (1993) and their  
184 horizontal distance was measured with laser rangefinders (Nikon Laser 100 AS  
185 and Bushnell Fusion 1 Mile). For aural detections, we estimated the perching tree  
186 position and then measured the distance to its trunk, while for visual detections,  
187 the position of the perching tree was more reliable. The number of

188 simultaneously detected individuals and the stratum of occurrence (ground,  
189 understory, middlestory, canopy, emergent tree) was noted for all detections.  
190 The autonomous sound recordings were stopped at the end of the point count.  
191 Considering that autonomous sound recorders typically collect data without  
192 human presence and can start recording earlier in sites that are difficult to  
193 access, we used twenty minute sound recordings starting 30 minutes before the  
194 point count (except one plot with 22 minutes offset) to compare the sampling  
195 completeness of both methods more fairly and avoid disturbance from human  
196 observers.

### 197 **Forest survey data analysis**

198 Six months after the point counts, recordings were uploaded to a website  
199 (<http://soundefforts.uni-goettingen.de>) designed to store and identify the birds  
200 within. The ornithologist who carried out the point count on the same day  
201 listened to the corresponding recordings while inspecting the spectrograms. The  
202 ornithologist tagged the bird calls with the species name, number of individuals,  
203 and estimated distance. The sound transmission sequence was used as  
204 reference to support the listener in estimating distances more accurately. An  
205 additional listener without ornithological knowledge listened to the same  
206 recordings to notify the ornithologist of calls that he did not detect in the  
207 recordings.

208 Abundance measures were rarely reported in the literature (but see Hobson et  
209 al., 2002), so we relied on our field survey to analyse abundances between  
210 survey methods, additionally to richness. Using both point count and sound  
211 recordings data, we counted the number of distinct species (species richness)  
212 and the sum of the maximum number of simultaneously detected individuals of  
213 each species (a conservative measure of abundance like in Teuscher et al., 2015)  
214 to assess the bird sampling completeness. Species richness and abundance were  
215 compared between methods using paired Wilcoxon mean comparison tests. The  
216 significance of statistical tests was assessed at a level of  $P < 0.05$ .

217 Using the field bird survey data, we investigated the bird detection frequency of  
218 each survey method in rings of equal area but increasing distance from the  
219 observer. In point count data, we estimated the direct distance to the detected  
220 bird using the observed stratum of occurrence and the horizontal distance data.  
221 For sound recordings, we used the direct distance estimates directly as noted by  
222 the listener. We analysed the detection probability in sound recordings relative to  
223 point counts by checking whether 100 randomly selected aural observations

224 from point counts, within a horizontal distance of 50 meters and all from one  
225 observer, also occurred in the corresponding simultaneous sound recordings. We  
226 categorized the bird detection in the audio material as heard, faint, or absent.

### 227 **Distance estimation experiment**

228 We used caged birds to estimate the accuracy of bird call distances obtained  
229 from sound recordings. Caged birds from two different species (*Prinia familiaris*  
230 and *Acridotheres javanicus*) were rented from local habitants and brought to a  
231 mature oil palm plantation. We installed a Song Meter (with two SMX-II  
232 microphones) on a wooden pole at a height of 1.5 m and recorded the sound at  
233 44.1 kHz. We recorded the same sound transmission sequence as in our field  
234 study, at distances of 10, 20, 30, 40, 50, 60, and 70 m to the front of the  
235 recorder, measured with the laser range finder. We placed the bird cages on the  
236 ground and recorded bird vocalizations at different distances, randomly chosen  
237 between 2 and 80 meters. The recordings were analysed blindly by KD and the  
238 distance of each vocalization was estimated aurally while listening to the sound  
239 transmission sequence as reference. When all recordings were processed, we  
240 plotted the results with a linear regression line for each call type and bird species  
241 and calculated the correlation between the measured and estimated bird  
242 distances.

## 243 **Results**

### 244 **Meta-analysis**

245 We found 23 studies with our Web of Science search string and 129 through  
246 Google scholar. 20 were relevant, and 17 had usable data for the meta-analysis.  
247 One additional unpublished data set was collected. All relevant references are  
248 listed in [Table 1](#). Almost all authors responded positively and were extremely  
249 cooperative to provide summary data or even entire data sets. However, in 5  
250 studies detection distance data were not available to correct for the point counts'  
251 larger detection range.

252

253 Overall, alpha richness values did not differ significantly between both survey  
254 methods in the identical range scenario (Fig 1 and Table S1), neither did they in  
255 subset models. Sound recordings tended to yield higher alpha richness values  
256 when compared to point counts, but lower gamma species richness.



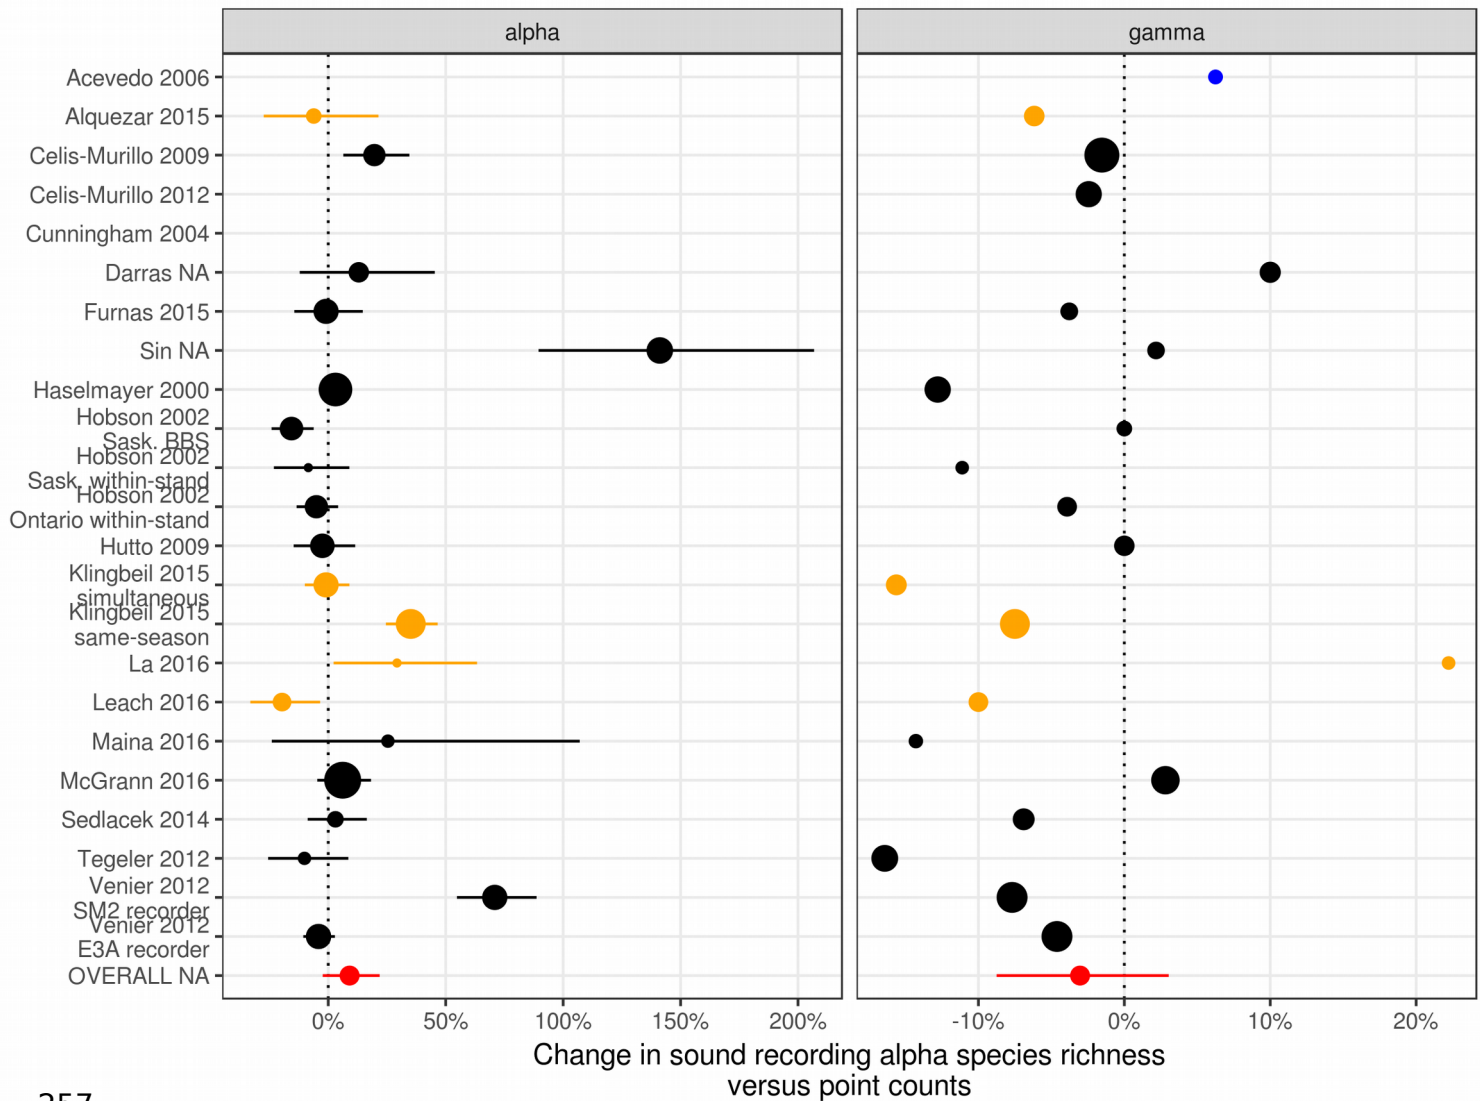

257

258 Figure 1: Response ratios of bird species richness sampled by automated sound recordings compared  
 259 to point counts . The error bars display 95% confidence intervals, and indicate a significant ( $P < 0.05$ )  
 260 difference to the control (point counts) when they do not overlap the dotted line. The dot size is  
 261 proportional to the sample size: sites number for alpha richness and total survey time for gamma  
 262 richness. Orange dots represent studies in which, because of lack of detection distance data, detection  
 263 ranges were greater for point counts than for sound recorders, while blue dots represent studies where  
 264 the detection range was larger for sound recordings.

265

266 We found that microphone signal-to-noise ratio was a significant, positive  
 267 predictor for the alpha (estimate: 0.086,  $P = 0.03$ ) and gamma richness log  
 268 response ratios (estimate: 0.007,  $P = 0.02$ ) in the unlimited range scenario (Fig 2  
 269 and Table S1).

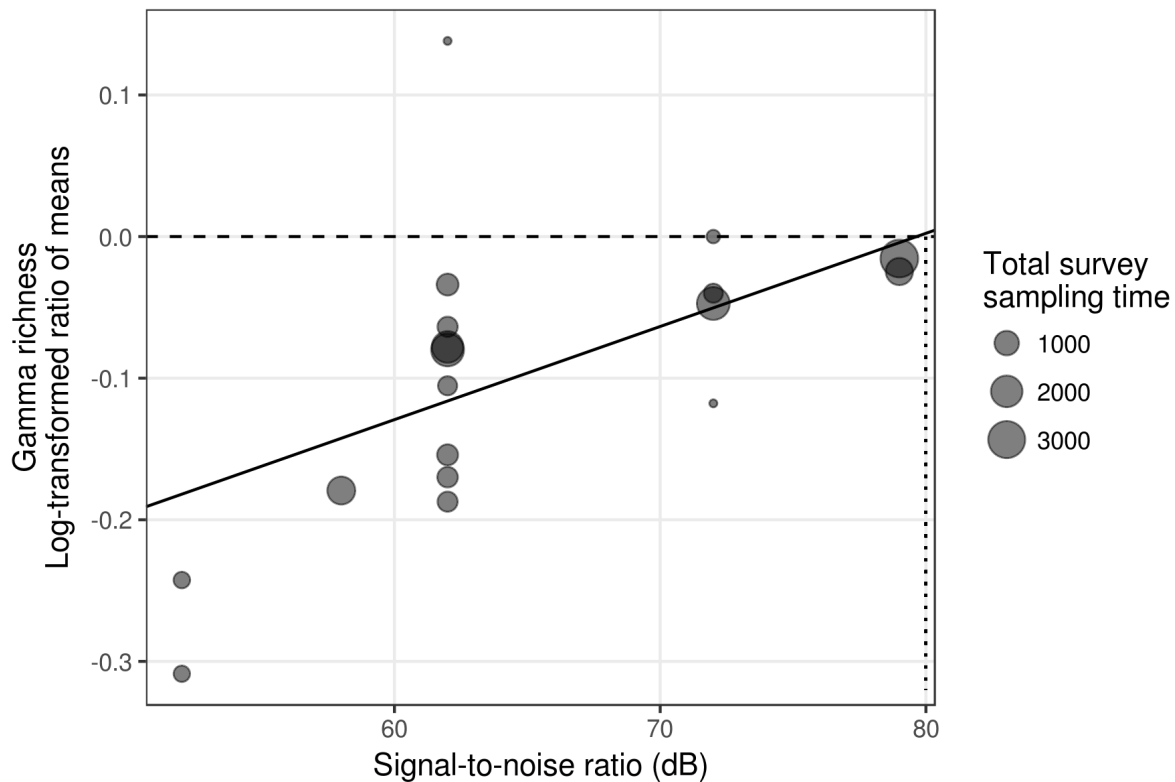

270

271 Figure 2: The relationship between microphone signal-to-noise ratio and log-transformed ratio of  
272 means for bird gamma richness. Positive values indicate higher gamma species richness in sound  
273 recordings versus point counts. The displayed regression line is based on a linear mixed effects model  
274 with signal-to-noise ratio as predictor, study ID as random effect, and total survey sampling time as  
275 weight. The line reaches zero at approximately 80 dB.

276

277 On average, species detected by both methods made up 81% of the total species  
278 count, both for identical and unlimited range detection areas. Respectively for  
279 the unlimited and identical range scenarios, 14% and 12% of all species were  
280 only detected with point counts, while 5% and 7% were only detected in sound  
281 recordings.

## 282 **Field studies**

### 283 **Bird abundance and richness in forest surveys**

284 In our field survey, bird abundance and species richness did not differ between  
285 survey methods (Fig S2). Paired-sample Wilcoxon signed rank tests for comparing  
286 mean richness and abundance between sampling methods were statistically not  
287 significant (richness estimate: 1.50,  $P = 0.27$ ; abundance estimate: 0.50,  $P =$   
288 0.16). Total richness reached 66 species in sound recordings, while only 58 were  
289 found in point counts.

290

291

## 292 **Detection distance in forest surveys**

293 Direct distances to detected birds were distributed differently between survey  
294 methods. Figure 3 shows how the detectability of both methods deviates from  
295 perfect conditions, where we would see an even histogram depicting equal  
296 detection rates in all area bins. Point counts showed a less steep decline in the  
297 number of detections with distance compared to sound recordings, but they also  
298 have a markedly lower detection rate at close distances.

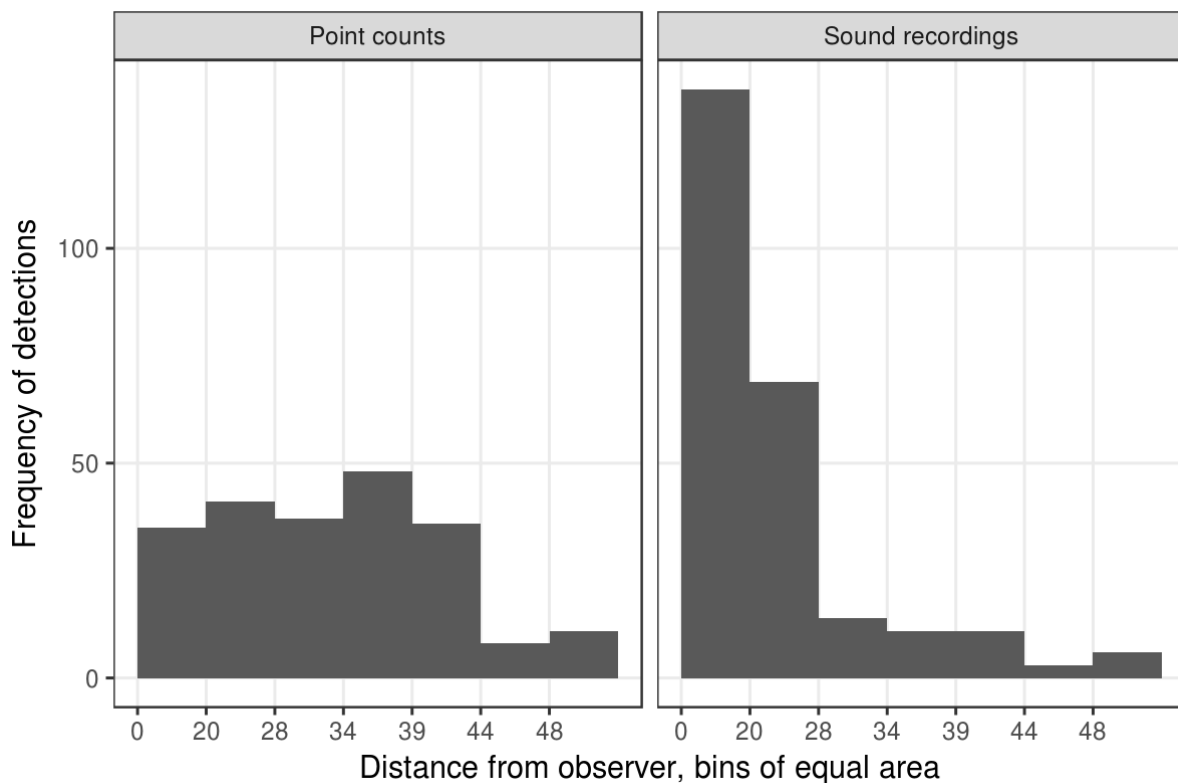

299

300 Figure 3: Frequency of bird detections with distance from the observer. Distances on the x-axis are  
301 separated in bins of equal area. Only 3% of detections are above 50 m.

302

## 303 **Distance estimation accuracy**

304 Estimated distance from sound recordings strongly correlated with the actual  
305 distances of the birds (Fig 4). The distances to the raucous call of *Acridotheres*  
306 *javanicus* correlated slightly less and were relatively over-estimated.

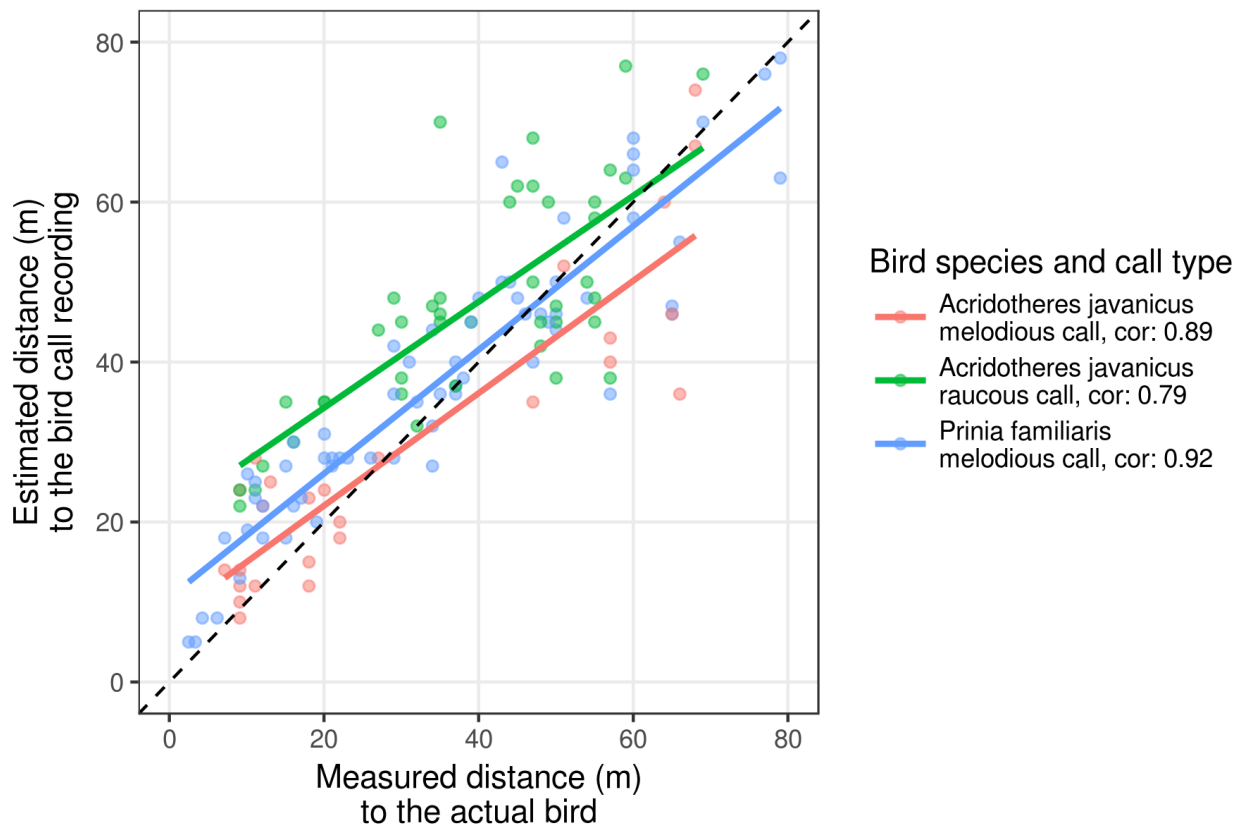

307

308 Figure 4: The relationship between distances estimated aurally from sound recordings and laser-  
309 measured distances to birds for two different bird species, one of which emitted two different call  
310 types

311

## 312 Discussion

### 313 Technical differences between humans and microphones

314 More often than not, people interested in autonomous sound recording systems  
315 ask: "What is the detection range of that system?". The answer is complex, as  
316 sound detection spaces have many determinants, like habitat structure, ambient  
317 sound level, as well as source sound level, height, and directivity (Darras et al.,  
318 2016). The variables that ecologists have influence on however, are the technical  
319 specifications of the recording systems.

320 Species detectability in sound recordings depends foremost on the microphone's  
321 sound quality. For our purposes, sound quality is best described by the signal-to-  
322 noise ratio, which indicates the microphone sound level output relative to its self-  
323 noise floor (usually measured with a 1 kHz, 94 dB SPL reference sound). The  
324 sound recorder electronic circuitry (pre-amplifiers) also add some noise  
325 geometrically to the microphone's self floor, but that figure is relatively small in  
326 comparison. In contrast, microphone sensitivity, which is more often reported

327 than the signal-to-noise ratio, merely describes the ratio between the analog  
328 input (sound pressure) to the electrical output (analog or digital) of the  
329 microphone and indicates the purpose of the microphone. Microphones for  
330 soundscape recordings are usually chosen with a sensitivity that is adapted to  
331 record the relatively low sound levels of wildlife (in contrast to a microphone for  
332 rock music vocalists) without clipping of the output signal. The final sound output  
333 level can additionally be adjusted in the recorder by signal amplification (usually  
334 digital), and as long as the recorded audio is not clipped (ie. does not surpass the  
335 microphone's output capacity), sound level can be corrected further by post-  
336 processing on a computer. It follows that microphone sensitivity is usually quite  
337 irrelevant. Signal-to-noise ratio however, cannot be altered or enhanced, it is a  
338 constant characteristic of the microphone which tells how faithfully and cleanly a  
339 microphone records sound.

340

341 The higher the signal-to-noise ratio, the higher the quality of the recordings since  
342 there is less intrinsic noise added by the microphone itself. Thus, the higher the  
343 signal-to noise ratio, the better far away calls that would be correspondingly faint  
344 in sound recordings can be heard or enhanced (by digital amplification or analog  
345 increase of the loudspeakers' volume) until they become audible. Thus  
346 increasing microphone signal-to-noise ratios improve detection and identification  
347 probability by extending their range. The only requirement is that the recorded  
348 sound levels of interest are above the microphone's self-noise. But it also follows  
349 that in natural recording settings, the ultimate limit to a sound recording  
350 system's detection range is the ambient sound level. Even the best microphones  
351 with signal-to-noise ratios below the ambient sound level cannot record far away  
352 bird sounds as soon as they drop below that point. Ambient sound level is made  
353 of "noise" sources like such as anthropogenic (i.e. engines), biophonic (i.e. insect  
354 noise), or geophonic (i.e. wind, rain) sounds, but also of all the other sounds of  
355 interest (like bird vocalizations).

356

357 Another important point is the fundamental difference between microphones and  
358 human ears in how they respond to different sound levels. Microphones are linear  
359 transducers of sound energy, which explains their limited dynamic range, as  
360 microphones are either optimized for loud or for faint sounds by their sensitivity  
361 level. The human auditory system, however, responds differently to sound  
362 energy: faint sounds are amplified, and loud sounds are dampened, resulting in

363 the impressive dynamic range of our ears (Stevens and Warshofsky, 1981). The  
364 latter phenomenon explains why we have a steep fall-off in the number of bird  
365 detections in sound recordings with distance (Fig 4), which is also apparent in the  
366 reduced number of detections in simultaneous recordings (Fig S2), especially at  
367 greater distances. Thus in our study, our detection range is relatively limited  
368 compared to point counts, due to the weak signal-to-noise ratio of our  
369 microphones, and it likely similar in all the other studies which used the same  
370 microphones.

371

## 372 **Systematic review**

373 The main challenge for comparing richness measures from the two different  
374 survey methods was to enable a fair comparison by using equal sampling areas  
375 for both methods. Most studies addressed that problem, but in several cases,  
376 that issue was not addressed, and sometimes distance data were not collected  
377 either to alleviate that problem. It resulted in comparisons between unequal  
378 sampling areas, usually biased towards point counts (Alquezar and Machado,  
379 2015; Klingbeil and Willig, 2015; La and Nudds, 2016; Leach et al., 2016).

380

381 In our field study, we used modestly quiet microphones: one SMX-II microphone  
382 with the common Panasonic WM-61A element (signal-to-noise ratio >62 dB), with  
383 one Knowles SPM0404UD5 element (signal-to-noise ratio >59 dB, this element  
384 was used for ultrasound recordings at night). Most studies in this meta-analysis  
385 used similar equipment (Song Meters from Wildlife Acoustics) with the same  
386 microphone element. We estimated that in our forest sites, there were only 5% of  
387 the total detections above 45 m, indicating roughly the “range” that these  
388 microphones deliver. Hutto et al. (2009) showed that with the same microphone  
389 elements in their open survey habitats, bird vocalisations above 100 m are  
390 mainly undetected in sound recordings because they are too distant. Venier et al.  
391 (2012) also demonstrated that most bird calls above 50 m are undetected with  
392 the same microphone elements. Sedlacek et al. (2015) also suggest that the  
393 signal-to-noise ratio is so low for sounds above 50 m that detectability is  
394 significantly decreased. Richness values from studies using unlimited radius  
395 point count data, that showed the strongest bias towards point counts, were  
396 entirely reversed when the distance data were used to equalize detection ranges  
397 between methods (eg. Hutto and Stutzman, 2009, Sin et al. unpublished data).

398

399 More recent microphones used since 2015 by the same manufacturer are much  
400 more accurate (SMM-A2 microphones, signal-to-noise ratio 80dB) and compare  
401 well to the more expensive setups that were used by other authors in this review  
402 (ME-62 from Sennheiser and Compression Zone Microphone from River Forks  
403 Research Corporation). In their studies, the recording system was also evaluated  
404 and deemed to pick up far away sounds as well as human ears, necessitating no  
405 truncation of the corresponding point count detections data set. At the other  
406 extreme, cheap microphones with low signal-to-noise ratio were used in several  
407 studies and shown to have a maximum range of 40 m (Furnas and Callas, 2015;  
408 McGrann and Furnas, 2016, Sin et al. unpublished data) or estimated to have  
409 even lower detection ranges of 20 m (Maina et al., 2016, pers. comm.). These  
410 were still comparable with the point counts data when truncated to these  
411 respective distances.

412

413 All in all, this underlines that while human observers presumably have a  
414 consistent detection range, the detection range of sound recorders is certainly  
415 very variable: it is dictated by their microphones' signal-to-noise ratio, which is a  
416 decision made in every study design, constrained for budgetary reasons. The  
417 dramatic influence of the signal-to-noise ratio was demonstrated in our analysis  
418 of the log response ratios in the unlimited range scenario (Fig 2), from which we  
419 can infer that higher-end microphones can be on par with human hearing by  
420 sampling sound detection spaces as large as those sampled by human  
421 observers.

422

423 Compared to point counts, the methodology of sound recording surveys itself is  
424 not standardized. Point counts have been performed for decades, and are most  
425 often based on a variation of the survey design described by Ralph et al. (1998).  
426 Sound recording setups however, differ with respect to the microphones'  
427 placement, which affects their detection range greatly. Installation of  
428 microphones on the ground places them in sound shadows (Morton 1975),  
429 effectively hiding them from the sound field. The number of microphones is also  
430 critical: choosing a single audio channel (mono configuration) leads to a loss of  
431 auditory and spatial information, which is necessary for estimating bird distances  
432 accurately. In the worst recording setup, placing low-cost (low signal-to-noise  
433 ratio) microphones on the ground while recording only one channel is equivalent  
434 to conducting a point count with a hearing-impaired person lying on the ground

435 while closing one ear. Thus, many of the presently reviewed studies suffered  
436 from a tactical disadvantage from the outset.

437

438 A further argument in favor of sound recorders is that almost all methodological  
439 comparison studies discussed here disadvantaged sound recorders because  
440 identical time intervals were compared, whereas autonomous sound recording  
441 units are capable of sampling continuously or at random times distributed  
442 through the day or the season. The advantage of autonomous sound recording  
443 units, when used with such a monitoring program that makes better use of them,  
444 is impressively demonstrated by Klingbeil et al. (2015) who showed a 35 %  
445 increase in alpha diversity (Table 1), although gamma diversity admittedly  
446 stayed slightly inferior, probably due to the smaller detection range of their  
447 sound recorders compared to point counts. Furnas and Callas (2015) also  
448 demonstrated how detection probability varies for different species with time of  
449 the day, also supporting the idea that sampling times distributed throughout the  
450 day will sample the entire bird community much more effectively, which is also  
451 echoed in La et al. (2016) where the most efficient sampling schedule for  
452 detecting the entire bird community was tested.

### 453 **Meta-analysis**

454 We chose to present two survey method comparisons in our meta-analysis: one  
455 with identical detection ranges, and the other with unrestricted/unlimited  
456 detection ranges. Both account for differences in sampling area in different ways.  
457 While the identical range scenario simply truncates data sets to a common  
458 detection distance and allows the direct comparison of mean richness values, the  
459 unrestricted range scenario accounts for differences in sampling area by  
460 including co-variables in the statistical model: out of microphone number, height,  
461 and signal-to-noise ratio, we found that the latter had the highest predictive  
462 power and used it to account for the different effective sampling areas. It was  
463 found that signal-to-noise ratio was a significant and strong positive predictor of  
464 the sampling success of sound recording systems. Both meta-analyses thus  
465 pointed to the same conclusion in different ways, namely that sampled species  
466 richness numbers do not differ between both survey methods when sampling  
467 areas are equal, and that in sound recordings, the sound detection area  
468 increases with signal-to-noise ratio, up to a point where both methods are  
469 perform equally.

470



471 When we examine the underlying detection rate profiles for each survey method  
472 more in detail (Fig 4) however, it appears that even with equal detection ranges,  
473 point counts and sound recorders do not sample the same area identically. Point  
474 counts often introduce avoidance zones around the center (eg. Supp. Mat. in  
475 Prabowo et al., 2016) and keep higher detection rates with increasing distance,  
476 while sound recording detection rates are focused on the center and rapidly fall  
477 off with distance. This points to the fact that distance sampling should be used to  
478 account for these different patterns to estimate abundance or density of birds.  
479 One should account for the different detectabilities of loud and quiet birds to  
480 compute richness estimates also. However distance estimation methods from  
481 sound recordings are not established yet, and estimated distance data was only  
482 available in our field study because of our particular distance estimation protocol  
483 using supporting sound transmission sequences. Therefore, when distance  
484 sampling is not used, it is preferable to truncate detection data sets to a  
485 common threshold distance below which there are no detectability differences  
486 between the treatments of interest (Schieck, 1997), an approach that we put  
487 forward in our meta-analysis with the identical detection ranges strategy.

488

## 489 **Comparison of bird point counts versus automated sound** 490 **recordings**

491 [Table 2](#): comparison of advantages and disadvantages of human observation (point count) and  
492 automated sound recording methods for surveying birds.

### 493 **a) Standardization and verifiability**

494 Point counts suffer from a trade-off between observation time and sampler bias:  
495 with an increasing number of observers more simultaneous - and thus temporally  
496 unbiased - data points can be obtained, but the number of observer-specific -  
497 thus sampler biased - data points increases. The considerable magnitude of the  
498 observer bias has been convincingly demonstrated by Alldredge et al. (Alldredge  
499 et al., 2007a) and Simons et al. (2007). In contrast, sound recorders incur no  
500 sampler bias (or recorder bias), provided that microphones are calibrated.  
501 Microphones are manufactured within given signal-to-noise ratio tolerances to  
502 start with, but signal-to-noise ratio may drift apart with time, depending on the  
503 environmental stress they have experienced (rainfall, temperature variations,  
504 mechanical shocks, etc.). Thus, regular measurement of microphone signal-to-  
505 noise ratio at different frequencies are required to ensure that they can be  
506 calibrated, so that different recording units have the same detection efficiency.

507 Alternatively, reference recordings such as our sound transmission sequence can  
508 help to gauge bird call distances in recordings. Even so, uncalibrated  
509 microphones only result in different detection probabilities, and do not incur  
510 biases in bird identification like different human observers do.

511

512 Verifiability is low for point count surveys as we are essentially depending on the  
513 identification skills, current physical state, and memory of a single observer.  
514 Especially in tropical regions, the higher number of species vocalizing  
515 simultaneously makes correct identification of all individuals a challenging task.  
516 Moreover, auditory detections are sometimes uncertain (Mortimer and Greene,  
517 2017). When point count observations have corresponding photographic or audio  
518 evidence material, the bias between observers can be lessened, but these  
519 verification data are seldom available. The bias can also be corrected by taking  
520 other preventive measures (Lindenmayer et al., 2009). To obtain verification data  
521 however, an additional worker is usually needed, further raising the costs of the  
522 survey. With sound recordings, audio material is essentially available at no  
523 additional cost, and it can be used at leisure for future identification checks.  
524 Venier et al (2012) showed how field survey data can be corrected using sound  
525 recordings and how greater species counts can be achieved after re-interpreting  
526 them. Even if sound recordings were processed by people with different or no  
527 experience, as long as the same expert ornithologist reviews all observations,  
528 the species identification can be standardized, which is particularly helpful in  
529 long-term monitoring projects.

530

### 531 **b) Sampling completeness**

532 Several factors affect the sampling completeness, one of which is the avoidance  
533 effect introduced by human observers. Shy species are usually affected by the  
534 presence of human observers, especially when there is more than one (Hutto and  
535 Mosconi, 1981). Disturbance effects from observers on birds are not well  
536 documented (but see Fernández-Juricic et al., 2001). On the contrary, it is also  
537 possible that some birds are attracted by human presence. In our field study,  
538 birds are relatively less often detected close to observer (Fig 4), where  
539 detectability should be highest. In contrast, bird detections in sound recordings  
540 are most often near to the recorder. We interpret these diverging patterns as  
541 evidence of a net avoidance effect in point counts, due to disturbing human  
542 presence. At best, this avoidance effect diminishes bird detectability at close

543 range if disturbed birds simply move further away while still being detected, but  
544 at worst, intolerant birds would be deterred and leave the detection area of the  
545 observer. Note however that this avoidance effect is dependent on the bird  
546 community (more secretive birds versus birds adapted to anthropogenic  
547 disturbance), and as Prabowo et al. (2016, supplementary materials) illustrated,  
548 birds in disturbed systems may exhibit that trend to a lesser degree. We do not  
549 discuss the lower number of detections in sound recordings at large distances  
550 since this was shown to be mainly a function of the microphones' signal-to-noise  
551 ratio.

552

553 Point count data include visual detections too, which is an undeniable advantage  
554 of point counts, especially in open habitats, where visual detections are more  
555 common. However, even survey comparisons in open habitats do not yield a  
556 large advantage for point counts (Alquezar and Machado, 2015; Celis-Murillo et  
557 al., 2012), and they do not necessarily have considerably more visual  
558 observations. In our study, only 5% of observations in our dataset were visual  
559 only, against 1% in Furnas and Callas (2015). Also, given enough (recording)  
560 time, most birds vocalize eventually by song or by call, so that most birds can be  
561 detected using passive acoustic monitoring. Finally, we note that in simultaneous  
562 surveys using both methods, the average percentage of species detected by  
563 both methods was relatively high (81%), with only 12% of species detected only  
564 in point counts.

565

566 In point counts of species-rich sites, birds can be missed when they occur  
567 simultaneously or because of human error (fatigue and lack of attention),  
568 especially during dawn chorus or during the first minutes of a point count (Hutto  
569 and Stutzman, 2009). Hutto et al. (2009) also showed that two thirds of the birds  
570 that were detected by autonomous recording units but failed to be detected in  
571 point counts were simply overlooked in field. Also abundance numbers can be  
572 underestimated for abundant birds (Bart and Schoultz, 1984). In contrast, sound  
573 recordings can be played back repeatedly, often leading to tangible advantages  
574 for infrequently vocalizing birds (Celis-Murillo et al., 2012), so that birds can only  
575 be missed if the listening time is constrained artificially or for budgetary reasons.  
576 Furthermore, spectrograms (e.g. sonograms) are routinely generated and  
577 inspected, while listening to audio recordings, so that bird calls are detected both

578 visually and aurally, further enhancing detection probability compared to the  
579 aural-only detection of birds in point counts.

580

581 There is some debate as to whether sound recordings are more or less effective  
582 than point counts for detecting rare birds. As Celis Murillo et al. (2012) pointed  
583 out, some authors found that point counts were more effective in some studies  
584 (Haselmayer and Quinn, 2000; Hutto and Stutzman, 2009). One possible reason  
585 is that since visual cues are available, rare birds can be identified with more  
586 certainty (Hutto and Stutzman, 2009; Leach et al., 2016), however in both of  
587 these studies, the sound recording systems had smaller detection ranges than  
588 the unlimited radius point counts they were compared to. Venier et al. (2012) on  
589 the other hand, argue that detecting rare species is more cost-effective in  
590 extensive data sets collected by sound recorders. Other than that, for vocalizing  
591 birds and at identical detection ranges, there is no reason why rare birds should  
592 be inherently more easily detectable with one or the other method.

593 Consequently, since detection probability is a function of sampling intensity, and  
594 sampling intensity is much more easily extended with sound recordings, passive  
595 acoustic monitoring systems have a much greater potential for detecting rare  
596 species or confidently concluding their absence (Tegeler et al., 2012), especially  
597 when combined with automated identification algorithms.

598

### 599 **c) Data types and compatibility**

#### 600 **Data types**

601 When visual detections are numerous, human observations can yield  
602 supplementary data about behavior (nest defence, territorial fights), consumed  
603 food items, stratum of occurrence in the vegetation, sometimes even the sex and  
604 age of the bird, although such data are rarely used and it is challenging to get a  
605 meaningful dataset that is suitable for statistical analyses. To some degree, bird  
606 calls also convey information that is accessible in sound recordings, since calls  
607 have different functions: territorial advertisement, mate attraction, and alarm  
608 calls all give information about the bird's current behavior. Also, distinguishing  
609 between songs - which are typically territorial - and calls can give cues about  
610 whether the habitat is suitable for breeding or is rather only visited by stray  
611 birds. In some cases when the bird is moving and calling at the same time,  
612 movement can also be reconstructed, especially when using microphone arrays  
613 (Blumstein et al., 2011). Depending on the position of the microphones, it is also

614 possible to reliably pinpoint the animals' position in space (Bower and Clark,  
615 2005) and deduce the calling height and stratum of occurrence.

616

617 Sound recordings provide continuous sound recordings where human observation  
618 can only provide a filtered sample of the original visual and aural observation. It  
619 enables to derive secondary data types that are not accessible with point count  
620 data. For example it is much easier to measure the call activity in time units or  
621 call rates, which can be an interesting alternative to abundance measurements.  
622 This relates more accurately with bird activity, which is a more relevant measure  
623 for functional analyses. Cunningham et al. (2004) showed that although vocal  
624 activity and bird abundance are significantly related, they are only weakly so,  
625 meaning that calling activity may represent an alternative to abundance  
626 measures, rather than a proxy for it. With continuous sound recordings, we can  
627 also analyse temporal dynamics throughout the day, between days and between  
628 seasons and assess phenological trends and temporal dynamics (Lellouch et al.,  
629 2014). Temporal beta diversity and species turnover can be analysed at any  
630 temporal scale and it is a major factor influencing species richness (Flohr et al.,  
631 2011), when alpha diversity can even be misleading (Tylianakis et al., 2005).  
632 Furthermore, we can generate sound diversity indices for large datasets  
633 automatically, at the only expense of coding and computation time. Sound  
634 diversity indices have been used repeatedly and usually correlate well with field  
635 measures of species richness (Depraetere et al., 2012). Finally, all other sonant  
636 animal taxa are also available, allowing a more holistic biodiversity survey.

637

#### 638 **d) Comparability and compatibility**

639 Two essential data types that are derived both from human observation and  
640 sound recording data are abundance and distance data. Both are obtained in  
641 different ways and it is worth to examine them in more detail.

642

643 Abundance data tend to be more readily obtained from point counts, since it is  
644 more intuitive to estimate the position of the birds and relate it to previous  
645 activity as to guess the bird abundance on the sampling site. However, especially  
646 in dense habitats, bird individuals are rarely seen and thus hard to distinguish so  
647 that we can never really know for sure whether two different non-simultaneous  
648 sightings correspond to the same or different individuals. A more conservative  
649 estimate of abundance is the maximal number of simultaneously detected

650 individuals of one species. It has been used before as a conservative measure of  
651 abundance (Clough et al., 2016; Teuscher et al., 2015), which was also our  
652 measure of choice. It can be obtained from both survey methods and allows to  
653 compare or merge datasets while using an identical measure of abundance. Still,  
654 it is also possible to count uniquely identified individuals in stereo recordings in a  
655 similarly intuitive manner as in point counts (Hobson et al., 2002), because the  
656 birds' location is audible. Similarly, individual birds have unique calls which can  
657 be distinguished from another upon close analysis (Beer, 1971). Simple  
658 presence/absence data can also be merged without compatibility issues, as is  
659 common in occupancy studies (McGrann and Furnas, 2016), and acoustic data  
660 sets have been merged with point count data in several other recent studies (eg.  
661 Leach et al., 2016; McGrann and Furnas, 2016). Sedlacek et al. (2015) also  
662 computed abundance values based on acoustic recordings. Finally, sound  
663 recordings may be more amenable to calculate bird density when they are used  
664 to sample audio snapshots several times a day (Buckland and Handel, 2006).

665

666 The estimation of bird distances in point counts can be challenging and  
667 inaccurate (Alldredge et al., 2007b). We must bear in mind, however, that even  
668 though the distance is measured, it is also an estimation because it is based on  
669 the estimated position of the animal, except in the few cases when it can be  
670 seen. In the more challenging case when the animal is moving, both sound  
671 recordings and point counts have similar issues because distances should  
672 actually be measured multiple times, or a rule be set for determining which  
673 distance to choose among the many recorded distances. We have shown in our  
674 experiment that distances can be estimated accurately with the help of  
675 reference material like our sound transmission sequence. One should note that  
676 atypical calls can be more challenging: in our experiment the raucous  
677 vocalizations of *Acridotheres javanicus* is more variable in intensity than typical  
678 broadcast calls, explaining the slight over estimation of their distances. However,  
679 we still attained a high correlation between measured and estimated distances.  
680 Presumably, the harmonic frequencies of bird vocalisations or lack thereof, which  
681 are easily visualised in spectrograms, serve as cues for the estimation of the  
682 distance. Previously, Hobson et al. (2002) suggested that spectrograms of bird  
683 calls can also be used to estimate their distance with reference to their sound  
684 source level. When microphones are calibrated and transmission patterns and  
685 source call sound levels are known, it is possible to calculate a distance, however

686 that approach would be more tedious than the one we used. Nevertheless, the  
687 accuracy of distance estimations from sound recordings should be evaluated in  
688 more detail with a variety of estimators, land use systems and directions, and if  
689 needed, new, more accurate methods should be devised.

690

#### 691 **e) Practicality**

##### 692 **Travel time**

693 Observers carrying out point counts usually only need to reach the sampling site  
694 once before the survey to become familiar with the itinerary and surroundings.  
695 For every subsequent data collection, only one travel is necessary. In contrast,  
696 sound recorders need to be installed before they start recording and must be  
697 picked up for collecting the data or recharging batteries (but see Aide et al.,  
698 2013 for an example of remote data collection and continuous power supply).  
699 Depending on the study design, either one of the survey methods could be more  
700 practical: if sampling rounds on consecutive days at the same site are needed  
701 and the theft risk is low, sound recorders will prove handy. If the number of  
702 sampling sites is high and replicate visits are few, either many recorders or  
703 frequent travels will be needed.

##### 704 **Scalability**

705 Due to the limited number of observers, the survey time for point count surveys  
706 needs to be optimised so that all target sites can be reached and enough time is  
707 spent on each site. Acoustic surveys, however, allow for greater flexibility in  
708 scaling up sampling effort, provided enough recorders are available. It is  
709 effortless to program automated sound recorders to record for more hours, or  
710 even the whole day, which only comes at the expense of data storage and  
711 processing time, as well as energy supply, both of which are generally cheap  
712 when compared with specialised labour (i.e. ornithologists). It must also be  
713 stressed that in species occupancy modeling, the number of replicate surveys  
714 considerably improves site-level detectability, overall accuracy and precision of  
715 state variables such as richness. It follows that autonomous recording units  
716 confer a considerable advantage in that respect because of the ease with which  
717 replicate surveys can be conducted.

##### 718 **Expert workforce**

719 It is often costly to hire taxonomic experts for traditional field surveys, which  
720 require their presence. Passive acoustic monitoring systems, however, can be  
721 installed and picked up by ornithologically inexperienced staff, whereas the

722 financial allocation for taxonomic experts can be minimized to use them only for  
723 the proper identification of the animals, or even postponed for the time when  
724 funds become available. Moreover, since their presence is not needed, data can  
725 be sent to them or accessed online (see <http://soundefforts.uni-goettingen.de/>),  
726 helping to keep travel costs low. It is often stated that identifying birds inside  
727 sound recordings is a time-consuming process, but solutions exist for shortening  
728 the processing time (Zhang et al., 2015), and it is always possible to restrict the  
729 listening time strictly to the time of the length of one broadcast, thereby  
730 simulating a “blind” point count.

731 In the near future, automated species identification is also conceivable so that  
732 reliance on expert ornithologists will be even further diminished. Numerous  
733 studies have showed how calls of single species can be detected with a  
734 measurable probability and accuracy using computer algorithms (e.g. Brandes,  
735 2008). Tegeler et al. (2012) demonstrated how automated analysis of sound  
736 recordings could significantly increase the total detected species count. The  
737 number of species that can be reliably identified computationally will  
738 unrelentingly increase, but it remains to be seen whether more complex song  
739 structures and entire song repertoires can be reliably assigned to species.  
740 Considerable input from human experts will be needed even with the most  
741 "intelligent" automated methods like machine learning. As for automatic  
742 identification of bats, some commercial solutions already exist for bats from  
743 temperate regions (Wildlife acoustics), but tropical bat communities are much  
744 more challenging.

#### 745 **Material costs**

746 In the case of birds, point counts usually only require binoculars and field gear.  
747 However, it is often the case that birders use their own, helping to keep the costs  
748 down. Autonomous sound recorders are however mostly quite costly, although a  
749 multitude of hardware solutions exist (see Merchant et al., 2015 for an overview),  
750 from do-it-yourself constructions (e.g. Maina et al., 2016; Whytock and Christie,  
751 2016) to commercial products (e.g. Wildlife acoustics) spanning a price range of  
752 hundreds to thousands of USD. An important consideration is also that in long-  
753 term studies, it is often difficult to hire the same people throughout, and  
754 ornithologists are rarely hired for conducting field surveys full-time. Sound  
755 recorders, however, are pieces of hardware that are purchased once and  
756 typically last for years if maintained properly. They can be used over and over  
757 again until irreparably broken or stolen, greatly facilitating long-term data



758 compatibility. Then again, commercially available recorders have limited life  
759 cycles and their microphones are eventually discontinued. The availability and  
760 specifications of such products are dictated by economic and marketing  
761 considerations, so that it is problematic to guarantee constant audio  
762 specifications of passive acoustic monitoring systems for decades.

### 763 **Transportability and usability**

764 Some wilderness habitats in forest, at high elevations, or unexplored regions can  
765 be very difficult to reach. Especially when conducting morning point counts of  
766 birds, the observer preferably has to be present on-site at dawn. This is often  
767 impossible in inaccessible areas where travel by night would be required, or  
768 dangerous in sensitive areas. When using sound recording platforms, however,  
769 as long as the recorder is installed before its programmed recording time, we can  
770 always reliably and exactly meet the desired schedule.

771 Prevost (2016) showed that acoustic recording systems, due to their low size and  
772 weight, were amenable to installation on air balloons to sample from elevated  
773 points of sound. Also deployment of sound recording units to inaccessible areas  
774 with unmanned aerial vehicles should be feasible. In the future, large  
775 geographical scales could also be sampled using autonomous wireless sensor  
776 networks (Collins et al., 2006).

777 Autonomous recording units are easy to use in the field and the lab. Sound  
778 recorders can be set up as quickly as humans need time for getting ready for the  
779 point count. In our own study, with pre-charged and pre-programmed commercial  
780 devices, installation can be completed in two minutes. With some less practical  
781 designs, installation can require half an hour (Hutto and Stutzman, 2009).

782 However, although recorders can be set up rapidly, they suffer from a drawback  
783 when it is raining: , many microphones are not weather- or waterproof and when  
784 protective foams are used, they are usually soaked with water after rain, which  
785 results in a loss of sensitivity and can take between less than one hour or several  
786 hours to dry, depending on ambient humidity, based on our own experience with  
787 Song Meters (Wildlife Acoustics). This is a technical challenge waiting for a  
788 solution. The scheduling of sound recorders does not usually require  
789 programming experience (eg. Song Meters of Wildlife Acoustics), but some  
790 custom open-source solutions (eg. Solo recorder, see Whytock and Christie,  
791 2016) need some form of command line tool knowledge.

### 792 **Rapid assessments**

793 Sound recordings could be used to rapidly assess the avian diversity of a  
794 sampling site. Alternatively, bird call types could be counted as a proxy for  
795 morphospecies, and audio recordings are particularly amenable to rapid visual  
796 screening as they can be represented as spectrograms. However, some birds  
797 have a large repertoire of song so they might bias that measure, and other birds  
798 are also mimicking other species. Still, on a more abstract level, sound diversity  
799 indices can be computed from soundscape recordings, providing an even faster  
800 measure of biodiversity (Sueur et al., 2008).

### 801 **Spatial scale of recordings**

802 Sound recorders have more detections in their central installation point because  
803 of inherent technical characteristics of microphones (Fig 4). This is an additional  
804 argument for sound recordings when bird surveys need to be carried out on  
805 small plots (homegardens, smallholdings, etc.) where human presence would  
806 affect birds in the entire plot, or even in open habitats, where human recorders  
807 are visible from far away. In sound recordings, the fact that the detection  
808 distance profile puts more weight on the center of the survey point is also useful,  
809 because environmental co-variables are usually measured close to the center,  
810 eventually enabling a closer spatial linkage between them and bird community  
811 variables.

812

813 To conclude, ecology is a field of constant improvement, and most of it is  
814 technological. We have shown that sound recording devices can detect species  
815 richness levels that are on par with human observers, and if used properly, they  
816 can surpass richness levels from point counts. Autonomous sound recording units  
817 are more practical, scalable, consistent, and provide verifiable results. There is  
818 even more room for improvements as automatic identification algorithms and  
819 sound archiving software solutions are developed, which will facilitate handling  
820 the huge amount of data that they are generating.

821 Even so, at the time of writing, machines do not replace humans yet quite. All  
822 audio data are ultimately identified, checked and reviewed by experts -  
823 ornithologists in the case of bird surveys - and the latter still fulfil an  
824 indispensable function. Some might fear that sound recording devices are  
825 putting ornithologists out of a job, however one might also argue the other way  
826 around: as bird survey data collection becomes accessible even to non-  
827 ornithologists, the amount of gathered data will probably increase so much that  
828 demand for expert workforce could increase. Ornithologists will have to become

829 more flexible as data can be analysed at any time, outside of survey seasons,  
830 from anywhere as long as the data can be downloaded. Thus of course,  
831 ornithologists will not become redundant; machines are not thinking yet, and  
832 even machine learning approaches require human operators. Bird-watching also  
833 still constitutes a major pastime for millions of people around the world,  
834 generating huge amounts of data likewise (eBird). Moreover, we will always need  
835 humans to observe birds, assess their behavior, study how they are ingrained in  
836 their complex ecosystems, and comprehend their role in the bigger picture.

837

## 838 **Acknowledgements**

839 We declare that there are no conflicts of interest. We warmly thank all  
840 collaborators who shared data and provided additional explanations to carry out  
841 our meta-analysis. We thank Edho Walesa Prabowo for carrying out some of the  
842 forest bird surveys. We thank the following persons and organizations for  
843 granting us access to and use of their properties: village leaders and local plot  
844 owners.

## 845 **Data archiving**

846 Data will be fully provided in the supplementary materials

847

848

849

## 850 **References**

- Aide, T.M., Corrada-Bravo, C., Campos-Cerqueira, M., Milan, C., Vega, G., Alvarez, R., 2013. Real-time bioacoustics monitoring and automated species identification. *PeerJ* 1, e103. doi:10.7717/peerj.103
- Allredge, M.W., Simons, T.R., Pollock, K.H., 2007a. Factors Affecting Aural Detections of Songbirds. *Ecol. Appl.* 17, 948–955.
- Allredge, M.W., Simons, T.R., Pollock, K.H., 2007b. A Field Evaluation of Distance Measurement Error in Auditory Avian Point Count Surveys. *J. Wildl. Manag.* 71, 2759–2766. doi:10.2193/2006-161
- Alquezar, R.D., Machado, R.B., 2015. Comparisons Between Autonomous Acoustic Recordings and Avian Point Counts in Open Woodland Savanna. *Wilson J. Ornithol.* 127, 712–723. doi:10.1676/14-104.1
- Araya-Salas, M., Smith-Vidaurre, G., 2016. warbleR: an r package to streamline analysis of animal acoustic signals. *Methods Ecol. Evol.* n/a-n/a. doi:10.1111/2041-210X.12624
- Bart, J., Schoultz, J.D., 1984. Reliability of Singing Bird Surveys: Changes in Observer Efficiency with Avian Density. *The Auk* 101, 307–318.
- Beer, C.G., 1971. Individual Recognition of Voice in the Social Behavior of Birds, in: Daniel S. Lehrman, R.A.H. and E.S. (Ed.), *Advances in the Study of Behavior*. Academic Press, pp. 27–74.
- Bibby, C.J., Burgess, N.D., Hill, D.A., 2000. *Bird Census Techniques, Revised*. edition. ed. Academic Pr Inc, London ; San Diego.
- Blumstein, D.T., Mennill, D.J., Clemins, P., Girod, L., Yao, K., Patricelli, G., Deppe, J.L., Krakauer, A.H., Clark, C., Cortopassi, K.A., Hanser, S.F., McCowan, B., Ali, A.M., Kirschel, A.N.G., 2011. Acoustic monitoring in terrestrial environments using microphone arrays: applications, technological considerations and prospectus: Acoustic monitoring. *J. Appl. Ecol.* 48, 758–767. doi:10.1111/j.1365-2664.2011.01993.x
- Bower, J.L., Clark, C., 2005. A Field Test of the Accuracy of a Passive Acoustic Location System. *Bioacoustics* 15, 1–14. doi:10.1080/09524622.2005.9753535
- Brandes, T.S., 2008. Automated sound recording and analysis techniques for bird surveys and conservation. *Bird Conserv. Int.* 18. doi:10.1017/S0959270908000415

- Buckland, S.T., Handel, C.M., 2006. Point-transect surveys for songbirds: robust methodologies. *The Auk* 123, 345–357.
- Celis-Murillo, A., Deppe, J.L., Ward, M.P., 2012. Effectiveness and utility of acoustic recordings for surveying tropical birds. *J. Field Ornithol.* 83, 166–179. doi:10.1111/j.1557-9263.2012.00366.x
- Clough, Y., Krishna, V.V., Corre, M.D., Darras, K., Denmead, L.H., Meijide, A., Moser, S., Musshoff, O., Steinebach, S., Veldkamp, E., Allen, K., Barnes, A.D., Breidenbach, N., Brose, U., Buchori, D., Daniel, R., Finkeldey, R., Harahap, I., Hertel, D., Holtkamp, A.M., Hörandl, E., Irawan, B., Jaya, I.N.S., Jochum, M., Klarner, B., Knohl, A., Kotowska, M.M., Krashevskaya, V., Kreft, H., Kurniawan, S., Leuschner, C., Maraun, M., Melati, D.N., Opfermann, N., Pérez-Cruzado, C., Prabowo, W.E., Rembold, K., Rizali, A., Rubiana, R., Schneider, D., Tjitrosoedirdjo, S.S., Tjoa, A., Tschardt, T., Scheu, S., 2016. Land-use choices follow profitability at the expense of ecological functions in Indonesian smallholder landscapes. *Nat. Commun.* 7, 13137. doi:10.1038/ncomms13137
- Collins, S.L., Bettencourt, L.M., Hagberg, A., Brown, R.F., Moore, D.I., Bonito, G., Delin, K.A., Jackson, S.P., Johnson, D.W., Burleigh, S.C., Woodrow, R.R., McAuley, J.M., 2006. New opportunities in ecological sensing using wireless sensor networks. *Front. Ecol. Environ.* 4, 402–407. doi:10.1890/1540-9295(2006)4[402:NOIESU]2.0.CO;2
- Cunningham, R.B., Lindenmayer, D.B., Lindenmayer, B.D., 2004. Sound recording of bird vocalisations in forests. I. Relationships between bird vocalisations and point interval counts of bird numbers – a case study in statistical modeling. *Wildl. Res.* 31, 195. doi:10.1071/WR02062
- Darras, K., Pütz, P., Fahrurrozi, Rembold, K., Tschardt, T., 2016. Measuring sound detection spaces for acoustic animal sampling and monitoring. *Biol. Conserv.* 201, 29–37. doi:10.1016/j.biocon.2016.06.021
- Depraetere, M., Pavoine, S., Jiguet, F., Gasc, A., Duvail, S., Sueur, J., 2012. Monitoring animal diversity using acoustic indices: Implementation in a temperate woodland. *Ecol. Indic.* 13, 46.
- Fernández-Juricic, E., Jimenez, M.D., Lucas, E., 2001. Alert distance as an alternative measure of bird tolerance to human disturbance: implications for park design. *Environ. Conserv.* 28, 263–269. doi:10.1017/S0376892901000273

- Flohre, A., Fischer, C., Aavik, T., Bengtsson, J., Berendse, F., Bommarco, R., Ceryngier, P., Clement, L.W., Dennis, C., Eggers, S., Emmerson, M., Geiger, F., Guerrero, I., Hawro, V., Inchausti, P., Liira, J., Morales, M.B., Oñate, J.J., Pärt, T., Weisser, W.W., Winqvist, C., Thies, C., Tschardt, T., 2011. Agricultural intensification and biodiversity partitioning in European landscapes comparing plants, carabids, and birds. *Ecol. Appl.* 21, 1772–1781. doi:10.1890/10-0645.1
- Furnas, B.J., Callas, R.L., 2015. Using automated recorders and occupancy models to monitor common forest birds across a large geographic region. *J. Wildl. Manag.* 79, 325–337. doi:10.1002/jwmg.821
- Haselmayer, J., Quinn, J.S., 2000. A comparison of point counts and sound recording as bird survey methods in amazonian southeast peru. *The Condor* 102, 887–893. doi:10.1650/0010-5422(2000)102[0887:ACOPCA]2.0.CO;2
- Haughland, D.L., Hero, J.-M., Schieck, J., Castley, J.G., Boutin, S., Sólymos, P., Lawson, B.E., Holloway, G., Magnusson, W.E., 2010. Planning forwards: biodiversity research and monitoring systems for better management. *Trends Ecol. Evol.* 25, 199–200. doi:10.1016/j.tree.2009.11.005
- Hobson, K.A., Rempel, R.S., Greenwood, H., Turnbull, B., Van Wilgenburg, S.L., 2002. Acoustic Surveys of Birds Using Electronic Recordings: New Potential from an Omnidirectional Microphone System. *Wildl. Soc. Bull.* 1973-2006 30, 709–720.
- Hutto, R.L., Mosconi, S.L., 1981. Lateral detectability profiles for line transect bird censuses: some problems and an alternative. *Stud. Avian Biol.* 6, 382–387.
- Hutto, R.L., Stutzman, R.J., 2009. Humans versus autonomous recording units: a comparison of point-count results. *J. Field Ornithol.* 80, 387–398. doi:10.1111/j.1557-9263.2009.00245.x
- Katz, J., Hafner, S.D., Donovan, T., 2016. Tools for automated acoustic monitoring within the R package *monitoR*. *Bioacoustics* 25, 197–210. doi:10.1080/09524622.2016.1138415
- Klingbeil, B.T., Willig, M.R., 2015. Bird biodiversity assessments in temperate forest: the value of point count versus acoustic monitoring protocols. *PeerJ* 3, e973. doi:10.7717/peerj.973
- La, V.T., Nudds, T.D., 2016. Estimation of avian species richness: biases in morning surveys and efficient sampling from acoustic recordings. *Ecosphere* 7, n/a-n/a. doi:10.1002/ecs2.1294

- Leach, E.C., Burwell, C.J., Ashton, L.A., Jones, D.N., Kitching, R.L., 2016. Comparison of point counts and automated acoustic monitoring: detecting birds in a rainforest biodiversity survey. *Emu - Austral Ornithol.* 116, 305–309. doi:10.1071/MU15097
- Lellouch, L., Pavoine, S., Jiguet, F., Glotin, H., Sueur, J., 2014. Monitoring temporal change of bird communities with dissimilarity acoustic indices. *Methods Ecol. Evol.* 5, 495–505. doi:10.1111/2041-210X.12178
- Lindenmayer, D.B., Wood, J.T., MacGregor, C., 2009. Do observer differences in bird detection affect inferences from large-scale ecological studies? *Emu* 109, 100–106.
- MacKinnon, J., Phillipps, K., 1993. *A Field Guide to the Birds of Borneo, Sumatra, Java, and Bali: The Greater Sunda Islands.* Oxford University Press.
- Maina, C. wa, Muchiri, D., Njoroge, P., 2016. Cost Effective Acoustic Monitoring of Biodiversity and Bird Populations in Kenya. bioRxiv 72546. doi:10.1101/072546
- McGrann, M.C., Furnas, B.J., 2016. Divergent species richness and vocal behavior in avian migratory guilds along an elevational gradient. *Ecosphere* 7, n/a-n/a. doi:10.1002/ecs2.1419
- Merchant, N.D., Fristrup, K.M., Johnson, M.P., Tyack, P.L., Witt, M.J., Blondel, P., Parks, S.E., 2015. Measuring acoustic habitats. *Methods Ecol. Evol.* n/a-n/a. doi:10.1111/2041-210X.12330
- Mortimer, J.A., Greene, T.C., 2017. Investigating bird call identification uncertainty using data from processed audio recordings. *N. Z. J. Ecol.* 41, 0–0.
- Prabowo, W.E., Darras, K., Clough, Y., Toledo-Hernandez, M., Arlettaz, R., Mulyani, Y.A., Tschardtke, T., 2016. Bird Responses to Lowland Rainforest Conversion in Sumatran Smallholder Landscapes, Indonesia. *PLOS ONE* 11, e0154876. doi:10.1371/journal.pone.0154876
- Prevost, S.C., 2016. *Estimating Avian Populations with Passive Acoustic Technology and Song Behavior.*
- Ralph, C.J., Sauer, J.R., Droege, S., 1998. *Monitoring bird populations by point counts.* DIANE Publishing.
- Schieck, J., 1997. Biased Detection of Bird Vocalizations Affects Comparisons of Bird Abundance among Forested Habitats. *The Condor* 99, 179–190. doi:10.2307/1370236

- Sedláček, O., Vokurková, J., Ferenc, M., Djomo, E.N., Albrecht, T., Hořák, D., 2015. A comparison of point counts with a new acoustic sampling method: a case study of a bird community from the montane forests of Mount Cameroon. *Ostrich* 86, 213–220.
- Simons, T.R., Alldredge, M.W., Pollock, K.H., Wettroth, J.M., Dufty, A.M., 2007. Experimental analysis of the auditory detection process on avian point counts. *The Auk* 124, 986–999. doi:10.1642/0004-8038(2007)124[986:EAOTAD]2.0.CO;2
- Stevens, S.S., Warshofsky, F., 1981. *Sound and Hearing*, Revised edition. ed. Time Life Education.
- Sueur, J., Pavoine, S., Hamerlynck, O., Duvail, S., 2008. Rapid Acoustic Survey for Biodiversity Appraisal. *PLoS ONE* 3, e4065. doi:10.1371/journal.pone.0004065
- Tegeler, A.K., Morrison, M.L., Szewczak, J.M., 2012. Using extended-duration audio recordings to survey avian species. *Wildl. Soc. Bull.* 36, 21–29.
- Teuscher, M., Vorlaufer, M., Wollni, M., Brose, U., Mulyani, Y., Clough, Y., 2015. Trade-offs between bird diversity and abundance, yields and revenue in smallholder oil palm plantations in Sumatra, Indonesia. *Biol. Conserv.* 186, 306–318. doi:10.1016/j.biocon.2015.03.022
- Tylianakis, J.M., Klein, A.-M., Tscharntke, T., 2005. Spatiotemporal variation in the diversity of Hymenoptera across a tropical habitat gradient. *Ecology* 86, 3296–3302.
- Venier, L.A., Holmes, S.B., Holborn, G.W., Mcilwrick, K.A., Brown, G., 2012. Evaluation of an automated recording device for monitoring forest birds. *Wildl. Soc. Bull.* 36, 30–39. doi:10.1002/wsb.88
- Viechtbauer, W., others, 2010. Conducting meta-analyses in R with the metafor package. *J Stat Softw* 36, 1–48.
- Villanueva-Rivera, L.J., Pijanowski, B.C., 2012. Pumilio: a web-based management system for ecological recordings. *Bull. Ecol. Soc. Am.* 93, 71–81.
- Voous, K.H., 1950. The Breeding Seasons of Birds in Indonesia. *Ibis* 92, 279–287. doi:10.1111/j.1474-919X.1950.tb01752.x
- Whytock, R.C., Christie, J., 2016. Solo: an open source, customizable and inexpensive audio recorder for bioacoustic research. *Methods Ecol. Evol.* n/a-n/a. doi:10.1111/2041-210X.12678
- Zhang, L., Towsey, M., Eichinski, P., Zhang, J., Roe, P., 2015. Assistive classification for improving the efficiency of avian species richness



surveys, in: Data Science and Advanced Analytics (DSAA), 2015. 36678  
2015. IEEE International Conference on. IEEE, pp. 1-6.

851

852 **Supplementary materials**

853 Table S1: Multivariate meta-analysis and generalised mixed-effects model results  
 854 for predicting alpha and gamma richness

| <b>response</b> | <b>Subset analysis</b> | <b>range</b> | <b>intercept</b> | <b>intercept_p</b> | <b>signal_to_noise</b> | <b>signal_to_noise_p</b> |
|-----------------|------------------------|--------------|------------------|--------------------|------------------------|--------------------------|
| alpha richness  |                        | identical    | 0.087            | 0.124              |                        |                          |
| alpha richness  | yes                    | identical    | 0.092            | 0.134              |                        |                          |
| gamma richness  |                        | identical    | -0.031           | 0.3                |                        |                          |
| gamma richness  | yes                    | identical    | -0.027           | 0.381              |                        |                          |
| alpha richness  |                        | unlimited    | -0.112           | 0.074              | 0.098                  | 0.009                    |
| gamma richness  |                        | unlimited    | -0.097           | 0                  | 0.007                  | 0.008                    |

855

856

857

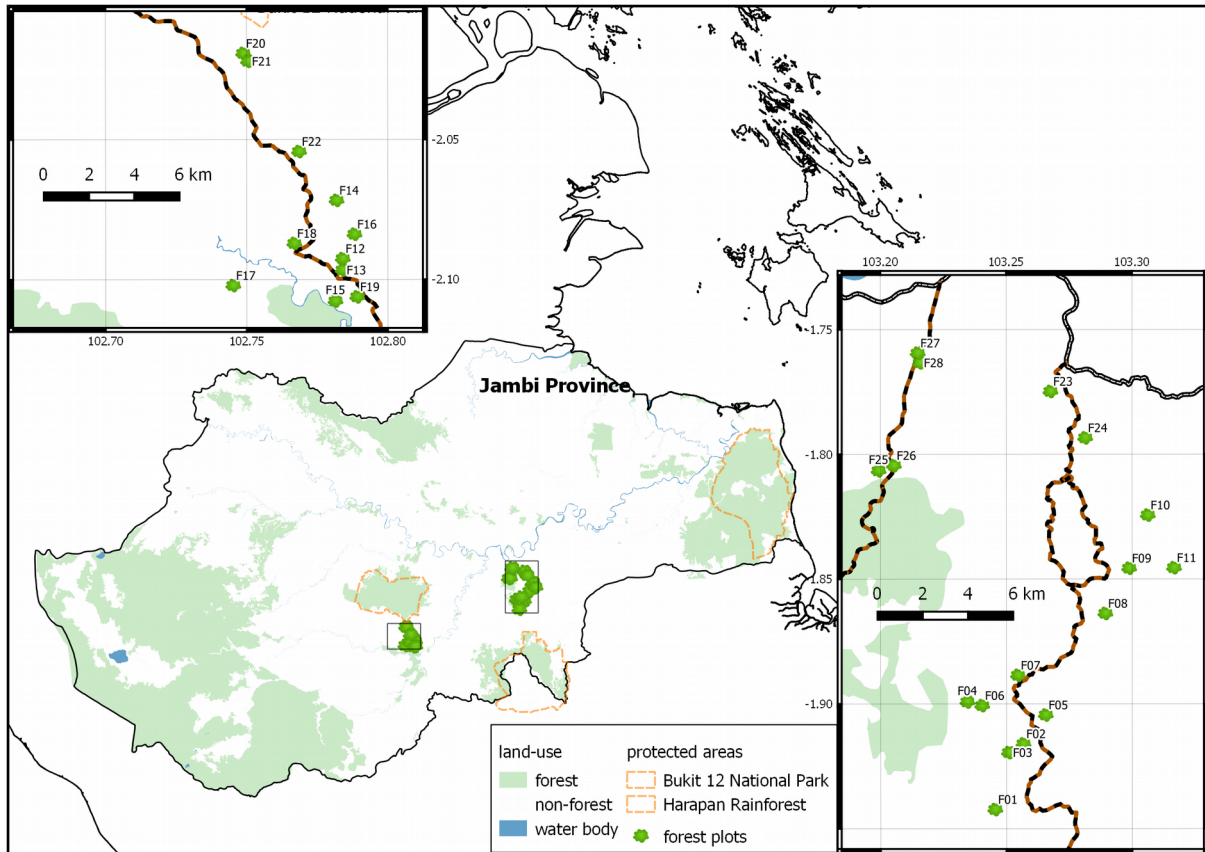

858  
859 Figure S1: Map of the forest plots used in the survey

860  
861  
862

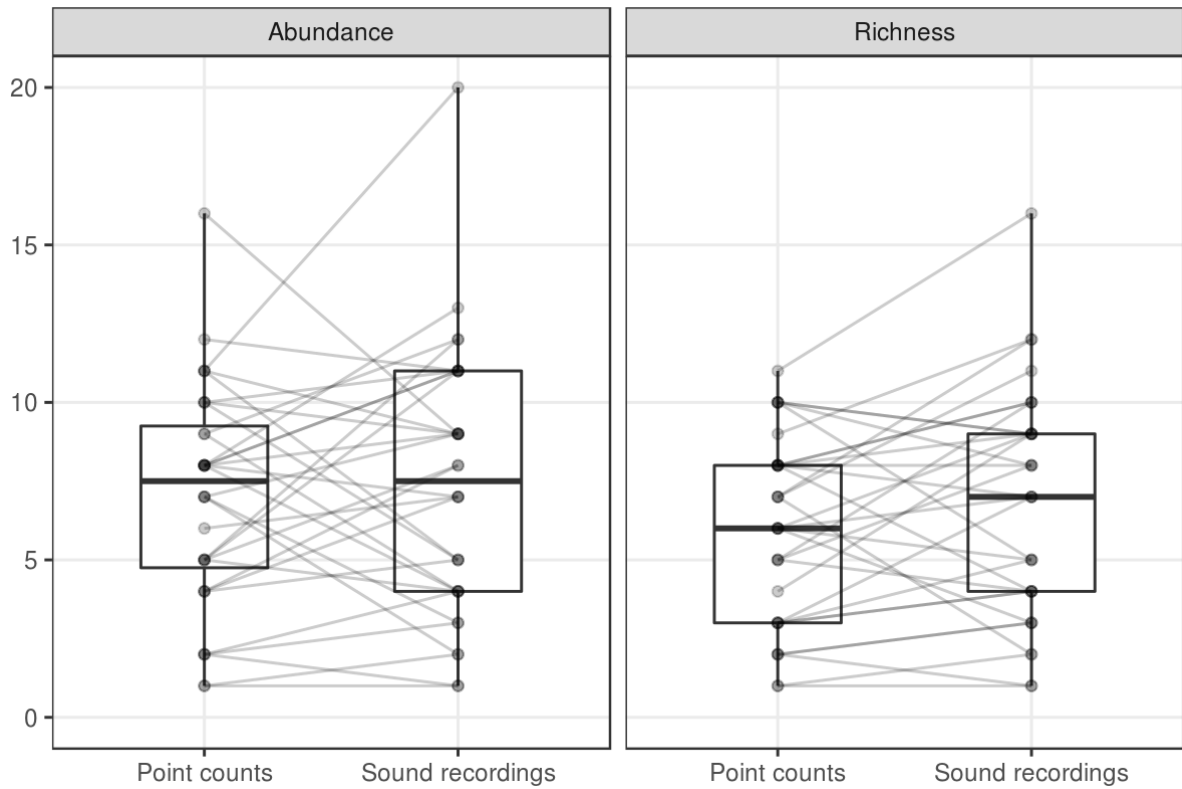

863

864 Figure S2: Bird richness and abundance sampled in 28 forest plots with 34 point counts and sound  
865 recordings, including all birds within 45 m from the sampler. Lines connect data points from identical  
866 plots, dots are partly transparent.

867

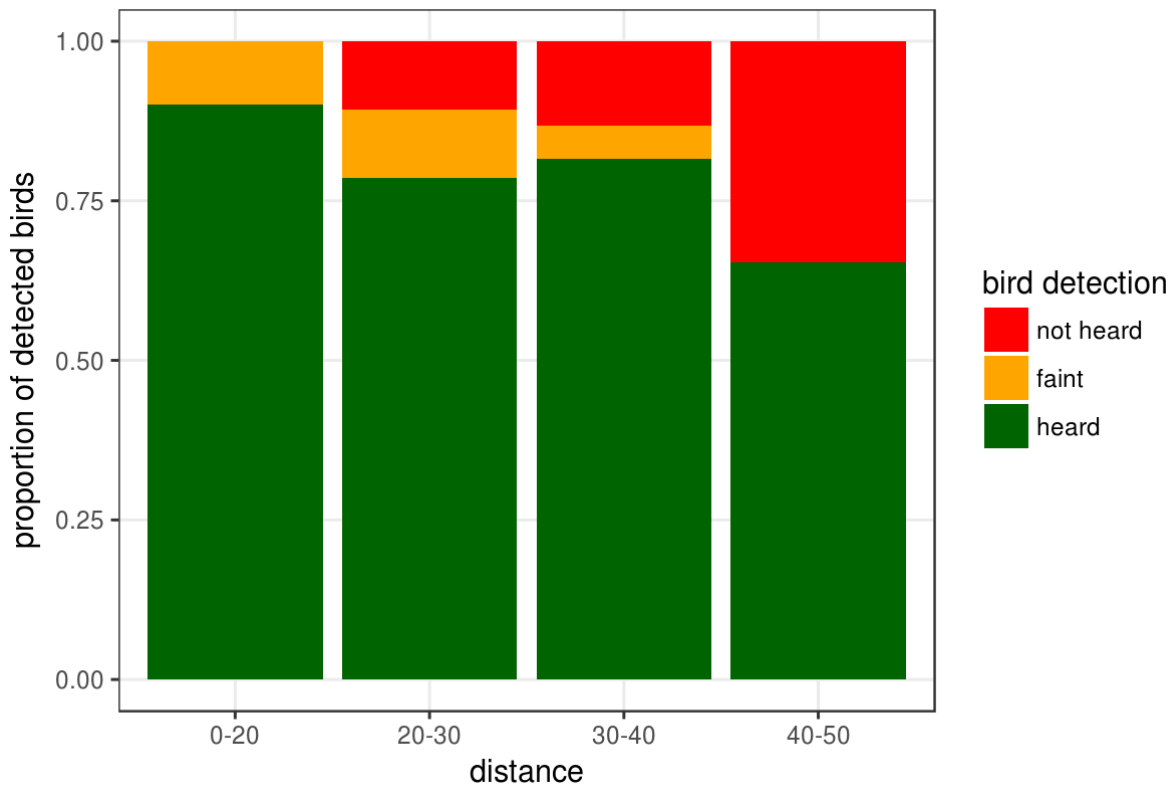

868

869 Figure S3: Proportion of birds detected in different distance classes in sound recordings that were  
 870 concurrent with point counts.  
 871

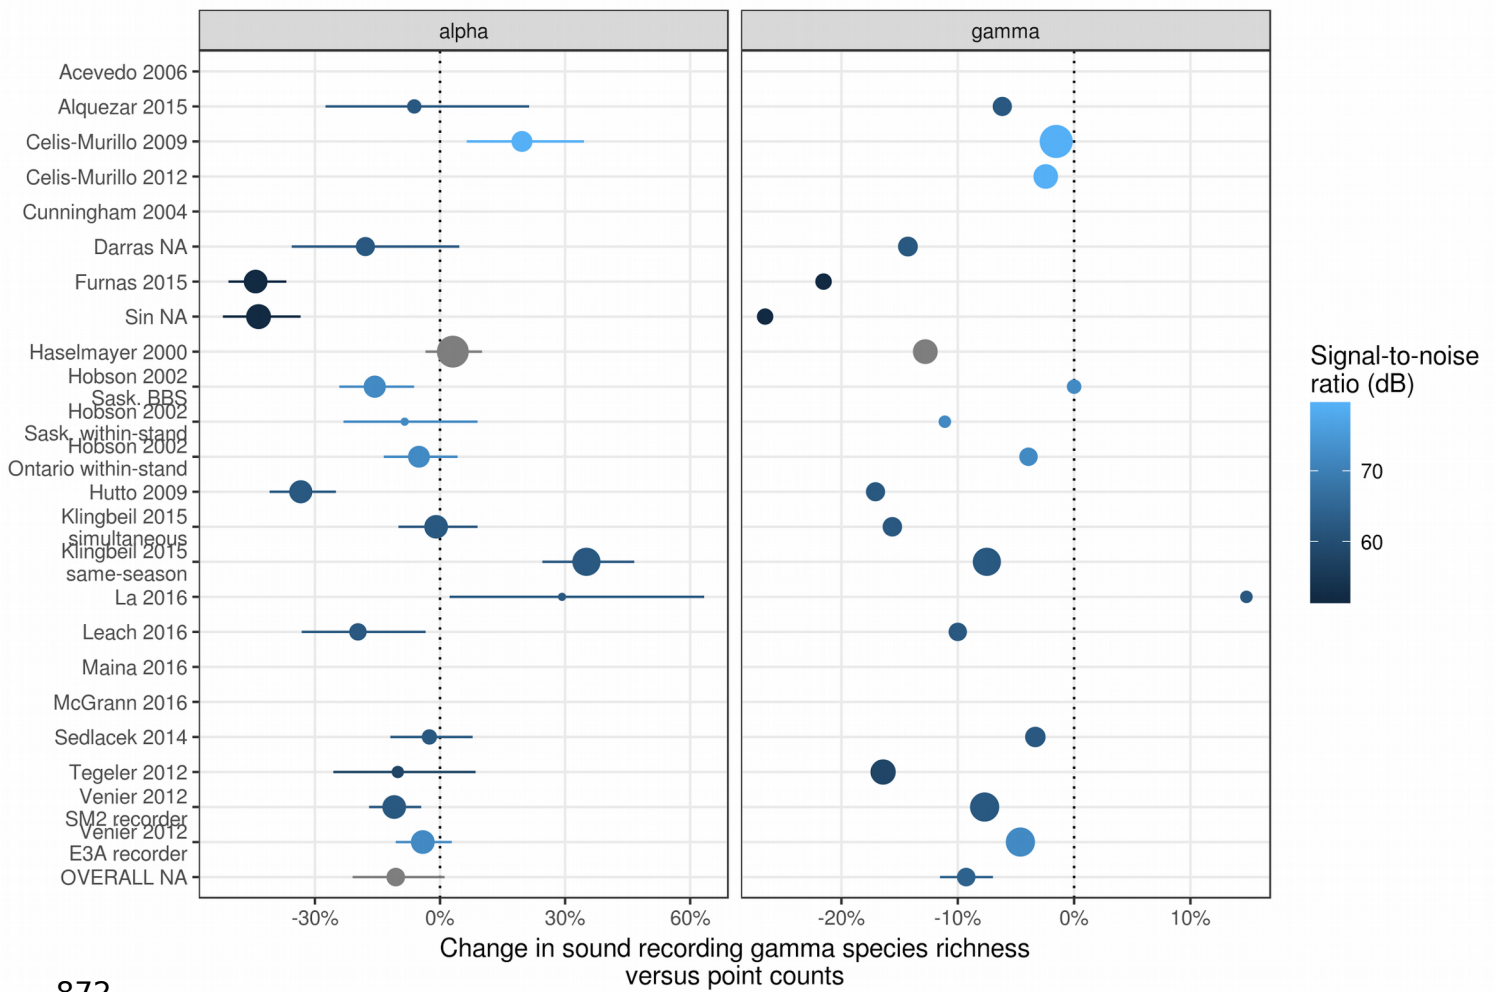

872  
 873 Figure S4: Response ratios for the unlimited range scenario. The overall value represents the response  
 874 ratio at a species richness corresponding to an average signal-to-noise ratio.
